# Supplementary material for: Walking-related digital mobility outcomes as clinical trial endpoint measures: protocol for a scoping review
Source: PubMed Central journal article supplement — BMJ Open. 2020 Jul 19;10(7):e038704. doi: 10.1136/bmjopen-2020-038704 (PMC7371223; doi:10.1136/bmjopen-2020-038704), 2020-07-19
Supplement: bmjopen-2020-038704supp001.pdf [file bmjopen-2020-038704supp001.pdf]

## Online Supplement 1: Eligibility criteria – details, definitions, and rationale

### Table of Contents

|                                                                                        |           |
|----------------------------------------------------------------------------------------|-----------|
| <b><i>Walking-Related Digital Mobility Outcome Definitions</i></b> .....               | <b>2</b>  |
| <b><i>Population Definitions</i></b> .....                                             | <b>5</b>  |
| Parkinson’s Disease.....                                                               | 5         |
| Multiple Sclerosis.....                                                                | 5         |
| Proximal Femoral Fracture.....                                                         | 6         |
| Chronic Obstructive Pulmonary Disease .....                                            | 6         |
| <b><i>Clinically-Relevant Measures included in Research Question 2</i></b> .....       | <b>7</b>  |
| <b><i>Clinically-Relevant Outcomes Included in Research Question 3</i></b> .....       | <b>15</b> |
| <b><i>Timed Walking Tests: Explicit Eligibility Criteria &amp; Rationale</i></b> ..... | <b>16</b> |
| <b><i>References</i></b> .....                                                         | <b>17</b> |

## Walking-Related Digital Mobility Outcome Definitions

The following set of gait and walking parameters will be included in the map and subsequent analysis produced in this scoping review. This list includes spatiotemporal parameters included in three well-known factor analyses of gait [1–3] (Table 1) and parameters associated with volume of walking which were prioritized by clinical and technical subject matter experts involved in the Mobilize-D project (Table 2). In keeping with the reflexive nature of scoping reviews, this list may be amended based on initial search findings as described in the study protocol.

Definitions adopted by the Mobilise-D Consortium:

- Human **walking** is a method of locomotion and is defined as initiating and maintaining a forward displacement of the centre of mass in an intended direction involving the use of the two legs which provide both support and propulsion. The feet are repetitively and reciprocally lifted and set down whereby at least one foot is in contact with the ground at all times.[4,5] **Walking** with walking aids is included in this definition. **Walking** is made up of **walking bouts** and is equivalent to taking steps/stepping forward (thus stepping in place does not constitute walking) and is defined as starting from initial contact for the initial step until ending with full floor contact of the foot making the last step.[6]
- A **step** is the interval between the initial contacts of the ipsi- and contralateral foot[4] and corresponds to the forward displacement of the foot together with a forward displacement of the trunk.[6]
- A **stride** is the interval between two successive initial contacts of the same foot. As such, a **stride** is equivalent to the gait cycle and every stride contains two **steps**. [4]

**Table 1: Gait parameters included in the review**

| Gait Parameter (Unit)     | Narrative Definition                                                                                                                                                                                                                                                                                                                                                                            | Dimension                    |
|---------------------------|-------------------------------------------------------------------------------------------------------------------------------------------------------------------------------------------------------------------------------------------------------------------------------------------------------------------------------------------------------------------------------------------------|------------------------------|
| <b>Spatial Parameters</b> |                                                                                                                                                                                                                                                                                                                                                                                                 |                              |
| Step length (cm)          | Typically defined as the anterior-posterior distance from the heel of one footprint to the heel of the opposite footprint.[3] For the purposes of this review, step length may also be measured between the toes or other identifiable markers on opposite footfalls.                                                                                                                           | Mean, variability, asymmetry |
| Stride length (cm)        | Typically defined as the anterior-posterior distance between heels of two consecutive footprints of the same foot (left to left, right to right); two steps (e.g., a right step followed by a left step) comprise one stride or one gait cycle.[3] For the purposes of this review, stride length may also be measured between the toes or other identifiable markers on consecutive footfalls. | Mean, variability            |

|                                          |                                                                                                                                                                                                                                                                                        |                              |
|------------------------------------------|----------------------------------------------------------------------------------------------------------------------------------------------------------------------------------------------------------------------------------------------------------------------------------------|------------------------------|
| Step width (cm)                          | The lateral distance from heel center of one footprint to the line of progression formed by two consecutive footprints of the opposite foot.[3] For the purposes of this review, step width may also be measured between the toes or other identifiable markers on opposite footfalls. | Mean, variability            |
| <b>Temporal Parameters</b>               |                                                                                                                                                                                                                                                                                        |                              |
| Cadence (steps/min)                      | Cadence is the number of steps per minute, sometimes referred to as step rate or frequency[3]                                                                                                                                                                                          | Mean, variability            |
| Step time (s)                            | Time elapsed from initial contact of one foot to initial contact of the opposite foot [3]                                                                                                                                                                                              | Mean, variability, asymmetry |
| Stride time (s)                          | Time elapsed between the initial contacts of two consecutive footfalls of the same foot [3]                                                                                                                                                                                            | Mean, variability            |
| Stance time (s, % of gait cycle)         | The stance phase is the weight bearing portion of each gait cycle initiated at heel contact and ending at toe off of the same foot; stance time is the time elapsed between the initial contact and the last contact of a single footfall [3]                                          | Mean, variability, asymmetry |
| Swing time (s)                           | The swing phase is initiated with toe off and ends with initial contact of the same foot; swing time is the time elapsed between the last contact of the current footfall to the initial contact of the next footfall of the same foot [3]                                             | Mean, variability, asymmetry |
| Single support time (s, % of gait cycle) | Single support occurs when only one foot is in contact with the ground; single support time is the time elapsed between the last contact of the opposite footfall to the initial contact of the next footfall of the same foot [3]                                                     | Mean, variability, asymmetry |
| Double support time (s, % of gait cycle) | Double support occurs when both feet are in contact with the ground simultaneously; double support time is the sum of the time elapsed during two periods of double support in the gait cycle [3]                                                                                      | Mean, variability            |
| <b>Spatiotemporal Parameters</b>         |                                                                                                                                                                                                                                                                                        |                              |
| Gait/Walking Speed (cm/s)                | Walking speed is the distance covered by the whole body within a certain time interval / per unit time of walking. It is measured in meters per second and is the magnitude of the velocity vector (velocity includes direction and magnitude of walking). [5]                         | Mean, variability            |
| Stride Speed (cm/s)                      | Stride speed is the distance covered by the whole body within a single stride per unit time of walking.                                                                                                                                                                                | Mean, variability            |

**Table 2: Parameters Assessing Volume of Walking**

| Mobility Parameter                             | Definition                                                                                                                                                                                                                                                                                                                                                                           |
|------------------------------------------------|--------------------------------------------------------------------------------------------------------------------------------------------------------------------------------------------------------------------------------------------------------------------------------------------------------------------------------------------------------------------------------------|
| <b>Daily Volume of Walking</b>                 |                                                                                                                                                                                                                                                                                                                                                                                      |
| Walking time                                   | The amount of time spent walking during a set period of time. Walking is made up of walking bouts and is equivalent to taking steps/stepping forward and is defined as starting from initial contact for the initial step until ending with full floor contact of the foot making the last step [6]                                                                                  |
| Step Count                                     | The number of steps made during a set period of time, such as a day or walking bout. A <i>step</i> is the interval between the initial contacts of the ipsi- and contralateral foot.[4]                                                                                                                                                                                              |
| Number, duration, or distance of walking bouts | <p>A <b>walking bout</b> (WB) is a walking sequence containing at least two consecutive strides of both feet (e.g. R-L-R-L or L-R-L-R-L-R).</p> <p>Start and end of a walking bout are determined by a resting period or any other activity (non-walking period). The initial step of a WB follows a non-walking period and the final step precedes the next non-walking period.</p> |

## Population Definitions

### Parkinson's Disease

#### *Proposed definition*

People who have received a confirmed diagnosis of Parkinson's Disease by a professional physician based on the relevant diagnostic criteria at the time of the study's publication. Studies including participants with any age range and disease severity level will be included in this review.

#### *Relevant Diagnostic Criteria may include, but are not limited to:*

- New International Parkinson Disease and Movement Disorder Society Diagnostic Criteria ([Postuma, Mov Dis 2015](#))
- Gelb's Criteria (National Institute of Neurological Disorders and Stroke) ([Gelb, JAMA Neurology, 1999](#))
- Queen's Square Brain Bank/UK Parkinson's Disease Society Brain Bank Diagnostic Criteria ([Hughes, J Neurol Neurosurg Psychiatry, 1992](#))

#### *Population Exclusion Criteria*

Studies of persons with atypical parkinsonian syndromes, drug-induced parkinsonism, or vascular parkinsonism are not included under these diagnostic criteria.

### Multiple Sclerosis

#### *Proposed definition*

People who have received a confirmed diagnosis of Multiple Sclerosis (MS) by a professional physician based on the relevant diagnostic criteria at the time of the study's publication. Studies including participants with any age range, severity level or sub-type of Multiple Sclerosis will be included in this review.

#### *Relevant Diagnostic criteria may include, but are not limited to:*

- McDonald diagnostic criteria ([McDonald, Ann Neurol, 2001](#)), including the [2005](#), [2010](#), and [2017](#) revisions
- Poser diagnostic criteria ([Poser, Ann Neurol, 1983](#))
- MAGNIMS consensus guidelines: MRI criteria for the diagnosis of MS ([Filippi, Lancet Neurology, 2016](#))
- Defining the clinical course of multiple sclerosis; The 2013 revisions ([Lubin et al, 2014](#))

#### *Population Exclusion Criteria*

Studies of persons experiencing or exhibiting clinically isolated syndrome (CIS), Neuromyelitis Optica Spectrum Disorder (NMOSD), Myelin oligodendrocyte glycoprotein (MOG), or Acute disseminated encephalomyelitis (ADEM) will be excluded. No additional exclusion criteria will be applied.

### Proximal Femoral Fracture

#### *Proposed definition*

We will include older people ( $\geq 65$  years of age) who have received surgical treatment (fixation or arthroplasty) for a low-energy fracture of the proximal femur. Both (intracapsular (also termed subcapital and transcervical) fractures or extracapsular (also termed trochanteric, intertrochanteric, pertrochanteric and subtrochanteric) fractures will be included.

#### *Relevant diagnostic criteria may include, but are not limited to:*

- ICD-10 diagnosis S72.0, S72.1, S72.2 as diagnosed on X-rays of the hip and pelvis

#### *Population Exclusion Criteria*

Studies of persons that do not meet the proposed definition of the target population will be excluded. No additional exclusion criteria will be applied.

### Chronic Obstructive Pulmonary Disease

#### *Proposed definition:*

People who have received a confirmed diagnosis of Chronic Obstructive Pulmonary Disease (COPD). In this context a “confirmed diagnosis” is defined as a diagnosis made by a professional physician based on the relevant diagnostic criteria at the time of the study’s publication. Studies including participants with any age range, severity level or sub-type of COPD will be included in this review.

#### *Relevant diagnostic criteria may include, but are not limited to:*

Patients with a diagnosis of chronic obstructive pulmonary disease (COPD), defined by spirometry. Any definition of COPD will be accepted as long as it is based on spirometry. For example, current guidelines recommend FEV1/FVC  $<0.7$  and FEV1 in % predicted  $<80\%$ .

#### *Population Exclusion Criteria*

Studies of persons that do not meet the proposed definition of the target population will be excluded. No additional exclusion criteria will be applied.

## Clinically-Relevant Measures included in Research Question 2

The following set of “clinically-relevant” measurements, summarized in [Table 1](#), will be included in the map and analysis associated with Research Question 1 in the Mobilise-D scoping review. The general measurements will be included in all disease-area sub-analyses, while disease-specific measurements will be included only in disease-specific analyses. In keeping with the reflexive nature of scoping reviews, this list may be amended based on initial search findings as described in the study protocol.

### Definitions

For the purposes of our review, “measurements” will refer to instruments or tests that assess an aspect of a patient’s health at a single point in time, while “outcomes” refer to identified changes in health status that result from the handling of a health problem. We will define “clinically-relevant” measurements as those that are routinely and broadly used in either clinical practice or in major pharmaceutical or epidemiological studies.

### Excluded Measurement Categories

We will exclude additional categories that are unlikely to provide additional information on the construct validity of gait and walking parameters, even if they are relevant to our included disease areas. However, some of these categories will be included in Research Question 3, allowing us to explore the relationship between these constructs and gait and walking parameters. These categories are:

- Sleep
- Life space
- Comorbidities
- Pain
- Frailty (Lack of common definition or method of testing frailty will limit any assessment of the DMOs’ construct validity)
- Hospital re-admissions and longitudinal outcome measures not assessable through cross-sectional study designs

### Included Measurements

Included measurements are summarized as acronyms in [Table 3](#) and listed in the order which they appear with full titles in [Table 4](#).

**Table 3: Summary of included clinically-relevant measurements by category and disease area.** Disease areas include Parkinson's disease (PD), multiple sclerosis (MS), chronic obstructive pulmonary disease (COPD), and proximal femoral fracture (PFF). Instrument names are provided in full in Table 4.

| Category                    |                                   | All disease areas                                                         | PD                                                                                   | MS                                                           | COPD                                                      | PFF                                  |
|-----------------------------|-----------------------------------|---------------------------------------------------------------------------|--------------------------------------------------------------------------------------|--------------------------------------------------------------|-----------------------------------------------------------|--------------------------------------|
| Disease Severity & Symptoms |                                   | CGI, PGI                                                                  | (MDS)-UPDRS – total, I, II, III, IV<br>H&Y, RDRS, UDysRS, FoGQ,<br>nFoGQ             | EDSS, FSS, MSFC,<br>Number of relapses<br>PDDS, GNDS, SNRS   | GOLD A-D, MMRC, Dyspnea<br>(VAS, Borg)<br># Exacerbations | Harris Hip Score<br>Oxford Hip Score |
| Physiological Measurements  |                                   |                                                                           |                                                                                      | Number/volume of lesions<br>Brain volume<br>BWCS, BLCS, IVIS | FEV1, FVC<br>FEV1/FVC Ratio                               |                                      |
| Functional Status/ADL       |                                   | Barthel Index<br>Nottingham EADL<br>IADL, LLFDI                           | Schwab & England<br>MDS-UPDRS – II, SPDDS, SPES,<br>PROMIS, Neuro-QoL                | Schwab & England<br>MSIS-29                                  |                                                           |                                      |
| HRQoL                       |                                   | EQ-5D (5L or 3L), EQ-VAS, SF-36<br>(RAND), SF-12, HUI3, LSQ               | PDQ-8, 10 or 39                                                                      | MSQoL-54<br>MSQLI, FAMS                                      | CAT, CRQ, SGRQ, CCQ<br>Feeling Thermometer                |                                      |
| Depression & Anxiety        |                                   | HADS, Beck, CES-D, GDS,<br>SDS/Zung, PHQ (2, 8, or 9), MHI                | LARS                                                                                 |                                                              |                                                           |                                      |
| Cognition                   |                                   | MMSE, MoCA, SDMT<br>PASAT, CANTAB, CAMCOG-R,                              | RBANS, ACE-R, PD-CRS, Trail<br>Making Test, Digit Span<br>Stroop Color and Word Test | ACE-R, PDQ, BICAMS                                           | <i>Not relevant</i>                                       |                                      |
| Falls                       |                                   | FES-I, Incidence of falls                                                 |                                                                                      |                                                              |                                                           |                                      |
| Physical Function           | Walking or Functional Assessments | 6MWT, TUG, STS, SPPB                                                      |                                                                                      | MSWS-12                                                      | ISWT, ESWT                                                | CAS                                  |
|                             | Motor Function & Balance          | ABC, Berg Balance, FAB,<br>BESTest, mini-BESTest<br>Ambulation Index (AI) | 360 degree (fast) turn test                                                          | 9-HPT (MSFC)<br>Disease Step                                 |                                                           |                                      |
|                             | Physical Activity                 | IPAQ, PASE                                                                |                                                                                      |                                                              | PROactive                                                 |                                      |
|                             | Strength                          | Quadriceps, Leg press, Grip                                               |                                                                                      |                                                              |                                                           | Hip abduction<br>Knee extension      |
|                             | Fatigue                           | FIS, mFIS, FSS, FACIT                                                     | PFS-16                                                                               |                                                              |                                                           |                                      |



**Table 4: Summary of included clinically-relevant measurements by category and disease area.**

| Disease area | Category                   | Acronym          | Full Name(s)                                           |
|--------------|----------------------------|------------------|--------------------------------------------------------|
| A - All      | 01 - Disease Severity      | CGI              | Clinical Global Impression Score                       |
| A - All      | 01 - Disease Severity      | PGI              | Patient Global Impression Score                        |
| A - All      | 02 - Functional Status/ADL | Barthel          | Barthel Index                                          |
| A - All      | 02 - Functional Status/ADL | LLFDI            | Late Life Function & Disability Instrument             |
| A - All      | 02 - Functional Status/ADL | IADL             | Lawton Instrumental Activities of Daily Living Scale   |
| A - All      | 02 - Functional Status/ADL | EADL             | Nottingham (Extended) Activities of Daily Living Scale |
| A - All      | 03 - HRQoL                 | EQ-5D (5L or 3L) | EuroQoL 5 Dimensions                                   |
| A - All      | 03 - HRQoL                 | EQ-VAS           | EuroQoL Visual Analog Scale                            |
| A - All      | 03 - HRQoL                 | HUI3             | Health Utilities Index Mark 3                          |
| A - All      | 03 - HRQoL                 | LISAT-9, LSQ     | Life Satisfaction Questionnaire                        |
| A - All      | 03 - HRQoL                 | SF-12, RAND      | Short Form 12 Health Survey                            |
| A - All      | 03 - HRQoL                 | SF-36            | Short Form 36 Health Survey                            |
| A - All      | 03 - HRQoL                 | SF-36 MCS        | Short Form 36 Mental Component Scale                   |
| A - All      | 03 - HRQoL                 | SF-36 PCS        | Short Form 36 Physical Component Scale                 |
| A - All      | 04 - Mental Health         | BDI, Beck        | Beck Depression Inventory                              |
| A - All      | 04 - Mental Health         | CES-D            | Center for Epidemiologic Studies Depression Scale      |
| A - All      | 04 - Mental Health         | GDS              | Geriatric Depression Scale                             |
| A - All      | 04 - Mental Health         | HADS             | Hospital Anxiety and Depression Scale                  |
| A - All      | 04 - Mental Health         | MHI              | Mental Health Inventory                                |
| A - All      | 04 - Mental Health         | PHQ              | Patient Health Questionnaire 8 or 9                    |
| A - All      | 04 - Mental Health         | SDS, Zung        | Zung Self-Rating Depression Scale                      |
| A - All      | 05 - Cognition             | CAMCOG-R         | Cambridge Cognitive Assessment (Revised)               |
| A - All      | 05 - Cognition             | CANTAB           | Cambridge Neuropsychological Test Automated Battery    |
| A - All      | 05 - Cognition             | MMSE             | Mini-Mental State Examination                          |
| A - All      | 05 - Cognition             | MoCA             | Montreal Cognitive Assessment                          |

|                |                                        |              |                                                                                    |
|----------------|----------------------------------------|--------------|------------------------------------------------------------------------------------|
| <b>A - All</b> | 05 - Cognition                         | PASAT        | Paced Auditory Serial Addition Test                                                |
| <b>A - All</b> | 05 - Cognition                         | SDMT         | Symbol Digit Modalities Test                                                       |
| <b>A - All</b> | 06 - Falls                             | FES-I        | Falls Self-Efficacy Scale - International                                          |
| <b>A - All</b> | 06 - Falls                             |              | Incidence of falls                                                                 |
| <b>A - All</b> | 07 - Walking or Functional Assessments | 2MWT         | 2 Minute Walk Test                                                                 |
| <b>A - All</b> | 07 - Walking or Functional Assessments |              | 4 to 10 meter walk (i.e., any straight walking test between 4-10 meters in length) |
| <b>A - All</b> | 07 - Walking or Functional Assessments | 6MWT         | 6 Minute Walk Test                                                                 |
| <b>A - All</b> | 07 - Walking or Functional Assessments | SPPB         | Short Physical Performance Battery                                                 |
| <b>A - All</b> | 07 - Walking or Functional Assessments | STS          | Sit to Stand Test                                                                  |
| <b>A - All</b> | 07 - Walking or Functional Assessments | T25FW        | Timed 25 Foot Walk                                                                 |
| <b>A - All</b> | 07 - Walking or Functional Assessments | TUG          | Timed Up & Go                                                                      |
| <b>A - All</b> | 08 - Motor Function & Balance          | ABC          | Activities-Specific Balance Confidence Scale                                       |
| <b>A - All</b> | 08 - Motor Function & Balance          | AI           | Ambulation Index                                                                   |
| <b>A - All</b> | 08 - Motor Function & Balance          | BESTest      | Balance Evaluation Systems Test                                                    |
| <b>A - All</b> | 08 - Motor Function & Balance          | BBS          | Berg Balance Scale                                                                 |
| <b>A - All</b> | 08 - Motor Function & Balance          | FAB          | Fullerton Advanced Balance Scale                                                   |
| <b>A - All</b> | 08 - Motor Function & Balance          | mini-BESTest | Mini-Balance Evaluation Systems Test                                               |
| <b>A - All</b> | 09 - Physical Activity                 | IPAQ         | International Physical Activity Questionnaire                                      |
| <b>A - All</b> | 09 - Physical Activity                 | PASE         | Physical Activity Scale for the Elderly                                            |
| <b>A - All</b> | 10 - Strength                          |              | Grip Strength                                                                      |
| <b>A - All</b> | 10 - Strength                          |              | Leg Press Strength                                                                 |

|                        |                            |                       |                                                                                                                 |
|------------------------|----------------------------|-----------------------|-----------------------------------------------------------------------------------------------------------------|
| <b>A - All</b>         | 10 - Strength              |                       | Quadriceps Strength                                                                                             |
| <b>A - All</b>         | 11 - Fatigue               | FIS, mFIS             | (modified) Fatigue Impact Scale for Daily Use                                                                   |
| <b>A - All</b>         | 11 - Fatigue               | FSS                   | Fatigue severity scale                                                                                          |
| <b>A - All</b>         | 11 - Fatigue               | MFIS                  | MS fatigue impact scale                                                                                         |
| <b>B - Parkinson's</b> | 01 - Disease Severity      | (MDS)-UPDRS - I       | (Movement Disorder Society) Unified Parkinson's Disease Rating Scale, subscore I                                |
| <b>B - Parkinson's</b> | 01 - Disease Severity      | (MDS)-UPDRS - III     | (Movement Disorder Society) Unified Parkinson's Disease Rating Scale, subscore III                              |
| <b>B - Parkinson's</b> | 01 - Disease Severity      | (MDS)-UPDRS - IV      | (Movement Disorder Society) Unified Parkinson's Disease Rating Scale, subscore IV                               |
| <b>B - Parkinson's</b> | 01 - Disease Severity      | (MDS)-UPDRS Total     | (Movement Disorder Society) Unified Parkinson's Disease Rating Scale, sum of all subscores (I, II, III, and IV) |
| <b>B - Parkinson's</b> | 01 - Disease Severity      | FOGQ                  | Freezing of Gait Questionnaire                                                                                  |
| <b>B - Parkinson's</b> | 01 - Disease Severity      | H&Y                   | Hoehn & Yahr Score                                                                                              |
| <b>B - Parkinson's</b> | 01 - Disease Severity      | nFOGQ                 | New Freezing of Gait Questionnaire                                                                              |
| <b>B - Parkinson's</b> | 01 - Disease Severity      | RDRS                  | Rush Dyskinesia Rating Scale                                                                                    |
| <b>B - Parkinson's</b> | 01 - Disease Severity      | UDysRS                | Unified Dyskinesia Rating Scale                                                                                 |
| <b>B - Parkinson's</b> | 02 - Functional Status/ADL | (MDS)-UPDRS - II      | (Movement Disorder Society) Unified Parkinson's Disease Rating Scale, subscore II                               |
| <b>B - Parkinson's</b> | 02 - Functional Status/ADL | NeuroQoL              | Neuro QoL Physical Function                                                                                     |
| <b>B - Parkinson's</b> | 02 - Functional Status/ADL | PROMIS                | Patient-Reported Outcome Measurement Information System (ADL test)                                              |
| <b>B - Parkinson's</b> | 02 - Functional Status/ADL | SE-ADL                | Schwab & England Activities of Daily Living Scale                                                               |
| <b>B - Parkinson's</b> | 02 - Functional Status/ADL | SPDDS                 | Self-Assessment Parkinson's Disease Disability Scale                                                            |
| <b>B - Parkinson's</b> | 02 - Functional Status/ADL | SPES                  | Short Parkinson's Evaluation Scale                                                                              |
| <b>B - Parkinson's</b> | 03 - HRQoL                 | PDQ-39, PDQ-8, PDQ-10 | Parkinson's Disease Questionnaire - 39 or 8 or 10                                                               |
| <b>B - Parkinson's</b> | 04 - Mental Health         | LARS                  | Lillie Apathy Rating Scale                                                                                      |
| <b>B - Parkinson's</b> | 05 - Cognition             | ACE-R                 | Addenbrooke's Cognitive Examination (Revised)                                                                   |

|                               |                                        |          |                                                                    |
|-------------------------------|----------------------------------------|----------|--------------------------------------------------------------------|
| <b>B - Parkinson's</b>        | 05 - Cognition                         |          | Digit Span                                                         |
| <b>B - Parkinson's</b>        | 05 - Cognition                         | PD-CRS   | Parkinson's Disease Cognitive Rating Scale                         |
| <b>B - Parkinson's</b>        | 05 - Cognition                         | RBANS    | Repeatable battery for the assessment of neuropsychological status |
| <b>B - Parkinson's</b>        | 05 - Cognition                         | Stroop   | Stroop Color and Word Test                                         |
| <b>B - Parkinson's</b>        | 05 - Cognition                         | TMT      | Trail Making Test                                                  |
| <b>B - Parkinson's</b>        | 08 - Motor Function & Balance          |          | 360 Degree (Fast) Turn Test                                        |
| <b>B - Parkinson's</b>        | 11 - Fatigue                           | PFS-16   | Parkinson's Fatigue Scale                                          |
| <b>C - Multiple Sclerosis</b> | 01 - Disease Severity                  | EDSS     | Kurtzke Expanded Disability Status Scale                           |
| <b>C - Multiple Sclerosis</b> | 01 - Disease Severity                  | FSS      | Kurtzke Functional Systems Scores                                  |
| <b>C - Multiple Sclerosis</b> | 01 - Disease Severity                  | MSFC     | Multiple Sclerosis Functional Composite                            |
| <b>C - Multiple Sclerosis</b> | 01 - Disease Severity                  |          | Number of Relapses                                                 |
| <b>C - Multiple Sclerosis</b> | 01 - Disease Severity                  | PDSS     | Patient Determined Disease Steps                                   |
| <b>C - Multiple Sclerosis</b> | 01 - Disease Severity                  | GNDS     | Guy's Neurological Rating Scale                                    |
| <b>C - Multiple Sclerosis</b> | 01 - Disease Severity                  | SNRS     | Scripps Neurological Rating Scale                                  |
| <b>C - Multiple Sclerosis</b> | 02 - Functional Status/ADL             | SE-ADL   | Schwab & England Activities of Daily Living Scale                  |
| <b>C - Multiple Sclerosis</b> | 02 - Functional Status/ADL             | MSIS-29  | Multiple Sclerosis Impact Scale - 29                               |
| <b>C - Multiple Sclerosis</b> | 02 - Functional Status/ADL             | MSQOL-54 | MS Quality of Life - 54                                            |
| <b>C - Multiple Sclerosis</b> | 03 - HRQoL                             | MSQLI    | MS Quality of Life Inventory                                       |
| <b>C - Multiple Sclerosis</b> | 03 - HRQoL                             | FAMS     | Functional Assessment of Multiple Sclerosis                        |
| <b>C - Multiple Sclerosis</b> | 03 - HRQoL                             | ACE-R    | Addenbrooke's Cognitive Examination (Revised)                      |
| <b>C - Multiple Sclerosis</b> | 05 - Cognition                         | PDQ      | Perceived Deficits Questionnaire                                   |
| <b>C - Multiple Sclerosis</b> | 05 - Cognition                         | BICAMS   | Brief International Cognitive Assessment for MS                    |
| <b>C - Multiple Sclerosis</b> | 07 - Walking or Functional Assessments | MSWS-12  | Multiple Sclerosis Walking Scale - 12                              |
| <b>C - Multiple Sclerosis</b> | 08 - Motor Function & Balance          | 9-HPT    | 9-Hole Peg Test                                                    |
| <b>C - Multiple Sclerosis</b> | 08 - Motor Function & Balance          | DS       | Disease Step                                                       |

|                               |                                        |              |                                                                   |
|-------------------------------|----------------------------------------|--------------|-------------------------------------------------------------------|
| <b>C - Multiple Sclerosis</b> | 12 - Physiological Measurements        |              | Number of lesions                                                 |
| <b>C - Multiple Sclerosis</b> | 12 - Physiological Measurements        |              | Volume of lesions                                                 |
| <b>C - Multiple Sclerosis</b> | 12 - Physiological Measurements        |              | Brain volume                                                      |
| <b>C - Multiple Sclerosis</b> | 12 - Physiological Measurements        | BWCS         | Bowel Control Scale                                               |
| <b>C - Multiple Sclerosis</b> | 12 - Physiological Measurements        | BLCS         | Bladder Control Scale                                             |
| <b>C - Multiple Sclerosis</b> | 12 - Physiological Measurements        | IVIS         | Impact of Visual Impairment Scale                                 |
| <b>D - COPD</b>               | 1 - Disease Severity                   | GOLD A-D     | Global Initiative for Chronic Obstructive Lung Disease Stages A-D |
| <b>D - COPD</b>               | 1 - Disease Severity                   | MMRC         | Modified Medical Research Council Dyspnea Scale                   |
| <b>D - COPD</b>               | 1 - Disease Severity                   | Dyspnea VAS  | Dyspnea Visual Analog Scale                                       |
| <b>D - COPD</b>               | 1 - Disease Severity                   | Dyspnea Borg | Dyspnea Borg Scale                                                |
| <b>D - COPD</b>               | 1 - Disease Severity                   |              | Number of Exacerbations                                           |
| <b>D - COPD</b>               | 12 - Physiological Measurements        | FEV1         | Forced Expiratory Volume 1%                                       |
| <b>D - COPD</b>               | 12 - Physiological Measurements        | FVC          | Functional Vital Capacity                                         |
| <b>D - COPD</b>               | 12 - Physiological Measurements        | FEV1/FVC     | Forced Expiratory Volume to Functional Vital Capacity Ratio       |
| <b>D - COPD</b>               | 03 - HRQoL                             | CAT          | COPD Assessment Test                                              |
| <b>D - COPD</b>               | 03 - HRQoL                             | CRQ          | Chronic Respiratory Disease Questionnaire                         |
| <b>D - COPD</b>               | 03 - HRQoL                             | SGRQ         | St. George's Respiratory Questionnaire                            |
| <b>D - COPD</b>               | 03 - HRQoL                             | CCQ          | Clinical COPD Questionnaire                                       |
| <b>D - COPD</b>               | 03 - HRQoL                             | FT           | Feeling Thermometer                                               |
| <b>D - COPD</b>               | 07 - Walking or Functional Assessments | ISWT         | Incremental Shuttle Walk Test                                     |

|                 |                                        |           |                                                    |
|-----------------|----------------------------------------|-----------|----------------------------------------------------|
| <b>D - COPD</b> | 07 - Walking or Functional Assessments | ESWT      | Endurance Shuttle Walk Test                        |
| <b>D - COPD</b> | 09 - Physical Activity                 | PROactive | PROactive instruments to measure physical activity |
| <b>E - PFF</b>  | 1 - Disease Severity                   | HHS       | Harris Hip Score                                   |
| <b>E - PFF</b>  | 1 - Disease Severity                   | OHS       | Oxford Hip Score                                   |
| <b>E - PFF</b>  | 7 - Walking or Functional Assessments  | CAS       | Cumulated Ambulation Score                         |
| <b>E - PFF</b>  | 10 - Strength                          |           | Hip abduction strength                             |
| <b>E - PFF</b>  | 10 - Strength                          |           | Knee Extension strength                            |

### Clinically-Relevant Outcomes Included in Research Question 3

The following set of “clinically-relevant” outcomes will be included in the map and analysis associated with Research Question 3 in the Mobilise-D scoping review. The general outcomes will be included in all population sub-analyses, while population-specific outcomes will be included only in population-specific analyses. In keeping with the reflexive nature of scoping reviews, this list may be amended based on initial findings as described in the protocol.

#### Definitions

In this review, “outcomes” refer to identified changes in health status that result from the handling of a health problem. “Clinically-relevant” measurements and outcomes are those that are routinely and broadly used in either clinical practice or in major pharmaceutical or epidemiological studies.

**Table 5: Summary of Included Clinically-Relevant Outcomes**

| <b>General Outcomes: All disease areas</b>                                                                 |                           |                        |                           |
|------------------------------------------------------------------------------------------------------------|---------------------------|------------------------|---------------------------|
| Disease/Disability Status or Progression                                                                   |                           |                        |                           |
| Health-Related Quality of Life                                                                             |                           |                        |                           |
| Mortality                                                                                                  |                           |                        |                           |
| Healthcare Utilization (e.g., hospitalizations, readmissions, home care, costs, invasive procedures, etc.) |                           |                        |                           |
| Physical Function (e.g., exercise capacity, motor function, balance, strength)                             |                           |                        |                           |
| Functional Status (e.g., activities of daily living)                                                       |                           |                        |                           |
| Fatigue                                                                                                    |                           |                        |                           |
| Cognition                                                                                                  |                           |                        |                           |
| Mental Health (e.g., depression, anxiety, apathy)                                                          |                           |                        |                           |
| Falls                                                                                                      |                           |                        |                           |
| Life Space                                                                                                 |                           |                        |                           |
| Residential Status                                                                                         |                           |                        |                           |
| Use of Mobility Aids                                                                                       |                           |                        |                           |
| <b>Disease-Specific Outcomes</b>                                                                           |                           |                        |                           |
| <b>Parkinson’s Disease</b>                                                                                 | <b>Multiple Sclerosis</b> | <b>COPD</b>            | <b>Hip Fracture</b>       |
| Development of Dyskinesia                                                                                  | Relapses                  | Exacerbations          | Hip score                 |
| Development of Freezing of Gait                                                                            | Lesions & Brain Volume    | Lung Function          | Bone mineral density      |
| Dopaminergic medication use                                                                                |                           | Dyspnea/Breathlessness | Incidence of new fracture |
| Development of postural instability                                                                        |                           | Cardiovascular Events  |                           |
| Dementia                                                                                                   |                           | Medication Usage       |                           |

## Timed Walking Tests: Explicit Eligibility Criteria & Rationale

During pilots, these criteria were easily and consistently interpreted in most cases. However, specific challenges arose regarding the eligibility of timed clinical assessments that include periods of walking. Generally, we will include timed gait speed tests, such as the 10-meter walk, but will exclude tests that aggregate or assess constructs other than gait speed. However, studies may still be included if DMOs were specifically assessed during the walking portions of excluded tests. Detailed instructions related to questions that arose during pilots are provided in [Table 6](#).

**Table 6: Instructions to reviewers for categorizing and interpreting traditional timed walking tests in this review**

| Test                                                                                                                      | How should the test be categorized/managed?                                                                                                                                                                                                                                                                                                                                                                                                                                                                                         |
|---------------------------------------------------------------------------------------------------------------------------|-------------------------------------------------------------------------------------------------------------------------------------------------------------------------------------------------------------------------------------------------------------------------------------------------------------------------------------------------------------------------------------------------------------------------------------------------------------------------------------------------------------------------------------|
| 4 meter, 7 meter, 10 meter walk test<br>Timed 25 foot walk<br>2 Minute Walk test<br>Walk tests of any distance up to 100m | Timed tests should be categorized as gait speed and captured in our review. Studies reporting these measures within the context of our research questions are included. Though the 2MWT is also referred to as a measure of exercise capacity, we include it to be conservative because it is not necessarily a different length or time than other traditional gait speed tests in mobility-impaired populations. 100m is an arbitrary threshold for distance-based walking tests such that they are roughly the same as the 2MWT. |
| 6 Minute Walk Test, Walk tests of any distance over 100m                                                                  | The total walk time should not be interpreted as walking speed. However, if the test is instrumented, any DMO captured during these tests should be included. This is because long clinical walk tests such as the 6-Minute Walk Test measure constructs such as exercise capacity and endurance rather than walking speed[7–12] and are not representative of typical real-world walking bout duration.[13–15]                                                                                                                     |
| Timed Up and Go test                                                                                                      | Any DMO measured during the walking portion of the test should be captured and included. The total time required to complete the Timed Up and Go should not be interpreted as walking speed. This is because the test also includes the time required to stand from seated position and return to a seated position.[16]                                                                                                                                                                                                            |
| Incremental Shuttle Walk Test<br>Endurance Shuttle Walk Test                                                              | Neither the ISWT nor the ESWT should be included as tests of gait speed in this review. Similar to the 6MWT, they are measures of exercise endurance rather than walking speed.[17,18] Further, they require that patients walk in time to audible cues, artificially altering cadence and gait speed. Therefore, no DMOs measured during these tests should be included in this review.                                                                                                                                            |
| Tests conducted on a set-speed treadmill                                                                                  | Speeds set by the researcher should not be interpreted as a patient's self-selected or top gait speed. However, other DMOs collected during treadmill walking should be included.                                                                                                                                                                                                                                                                                                                                                   |



## References

- 1 Vergheze J, Wang C, Lipton RB, *et al.* Quantitative gait dysfunction and risk of cognitive decline and dementia. *J Neurol Neurosurg Psychiatry* 2007;**78**:929–35. doi:10.1136/jnnp.2006.106914
- 2 Lord S, Galna B, Vergheze J, *et al.* Independent Domains of Gait in Older Adults and Associated Motor and Nonmotor Attributes: Validation of a Factor Analysis Approach. *Journals Gerontol Ser A Biol Sci Med Sci* 2013;**68**:820–7. doi:10.1093/gerona/gls255
- 3 Hollman JH, McDade EM, Petersen RC. Normative spatiotemporal gait parameters in older adults. *Gait Posture* 2011;**34**:111–8. doi:10.1016/j.gaitpost.2011.03.024
- 4 Perry J. *Ganganalyse: Norm und Pathologie des Gehens*. 1st ed. München: : Urban & Fischer 2003.
- 5 Whittle M. *Gait analysis: An introduction*. 3rd ed. Edinburgh: : Butterworth-Heinemann 2005.
- 6 Dijkstra B, Kamsma YP, Zijlstra W. Detection of Gait and Postures Using a Miniaturized Triaxial Accelerometer-Based System: Accuracy in Patients With Mild to Moderate Parkinson's Disease. *Arch Phys Med Rehabil* 2010;**91**:1272–7. doi:10.1016/j.apmr.2010.05.004
- 7 Steffen TM, Hacker TA, Mollinger L. Age- and Gender-Related Test Performance in Community-Dwelling Elderly People: Six-Minute Walk Test, Berg Balance Scale, Timed Up & Go Test, and Gait Speeds. *Phys Ther* 2002;**82**:128–37. doi:10.1093/ptj/82.2.128
- 8 Kosak M, Smith T. Comparison of the 2-, 6-, and 12-minute walk tests in patients with stroke. *J Rehabil Res Dev* 2005;**42**:103–8. doi:10.1682/JRRD.2003.11.0171
- 9 Bean JF, Kiely DK, Leveille SG, *et al.* The 6-Minute Walk Test in Mobility-Limited Elders: What Is Being Measured? *Journals Gerontol Ser A Biol Sci Med Sci* 2002;**57**:M751–6. doi:10.1093/gerona/57.11.M751
- 10 Andersson M, Moberg L, Svantesson U, *et al.* Measuring walking speed in COPD: test-retest reliability of the 30-metre walk test and comparison with the 6-minute walk test. *Prim Care Respir J* 2011;**20**:434–40. doi:10.4104/pcrj.2011.00082
- 11 Forrest GF, Hutchinson K, Lorenz DJ, *et al.* Are the 10 Meter and 6 Minute Walk Tests Redundant in Patients with Spinal Cord Injury? *PLoS One* 2014;**9**:e94108. doi:10.1371/journal.pone.0094108
- 12 Fulk GD, Echternach JL, Nof L, *et al.* Clinometric properties of the six-minute walk test in individuals undergoing rehabilitation poststroke. *Physiother Theory Pract* 2008;**24**:195–204. doi:10.1080/09593980701588284
- 13 Orendurff MS, Schoen JA, Bernatz GC, *et al.* How humans walk: Bout duration, steps per bout, and rest duration. *J Rehabil Res Dev* 2008;**45**:1077–90. doi:10.1682/JRRD.2007.11.0197
- 14 Del Din S, Godfrey A, Galna B, *et al.* Free-living gait characteristics in ageing and Parkinson's disease: impact of environment and ambulatory bout length. *J Neuroeng Rehabil* 2016;**13**:46. doi:10.1186/s12984-016-0154-5
- 15 Godfrey A, Morris R, Hickey A, *et al.* Beyond the front end: Investigating a thigh worn accelerometer device for step count and bout detection in Parkinson's disease. *Med Eng Phys* 2016;**38**:1524–9. doi:10.1016/J.MEDENGGPHY.2016.09.023
- 16 Podsiadlo D, Richardson S. The Timed "Up & Go": A Test of Basic Functional Mobility for Frail Elderly Persons. *J Am Geriatr Soc*

- 1991;**39**:142–8. doi:10.1111/j.1532-5415.1991.tb01616.x
- 17 Revill SM, Morgan MDL, Singh SJ, *et al.* The endurance shuttle walk: A new field test for the assessment of endurance capacity in chronic obstructive pulmonary disease. *Thorax* 1999;**54**:213–22. doi:10.1136/thx.54.3.213
- 18 Singh SJ, Morgan MDL, Scott S, *et al.* Development of a shuttle walking test of disability in patients with chronic airways obstruction. *Thorax* 1992;**47**:1019–24. doi:10.1136/thx.47.12.1019
